# Supplementary material for: Concurrent boron removal from reverse osmosis concentrate and energy production using a microbial desalination cell-Donnan dialysis hybrid system
Source: Royal Society of Chemistry journal article supplement (doi:10.1039/d4ew00621f), 2024-01-01
Supplement: d4ew00621f1.pdf [file d4ew00621f1.pdf]

**Supplementary Materials**

for

Concurrent Boron Removal from Reverse Osmosis Concentrated and Energy Production using  
Microbial Desalination Cell-Donnan Dialysis Hybrid System

*A. Yagmur Goren<sup>a</sup> and H. Eser Okten <sup>\*a</sup>*

**Table SM1.** Comparison of COD removal efficiencies, desalination efficiencies, and power production of the different MDC and MDC-DD hybrid system configurations.

| Reactor type | Anode electrode        | Cathode material                                             | Contaminant type and concentration                                 | COD removal efficiency (%) | Desalination efficiency (%) | Power density           | Ref.       |
|--------------|------------------------|--------------------------------------------------------------|--------------------------------------------------------------------|----------------------------|-----------------------------|-------------------------|------------|
| QMDC         | Graphite               | Graphite                                                     | 30 mg/L of salt solution                                           | 91.1                       | 72.8                        | 8.16 W/m <sup>3</sup>   | 1          |
| MDC          | Graphite brush         | Carbon cloth                                                 | 100 mM NaCl and 100 mM NaHCO <sub>3</sub> containing salt solution | 52                         | 66                          | 8.01 W/m <sup>3</sup>   | 2          |
| MDC          | Carbon brush           | Activated carbon and PTFE electrode                          | 35 g/L NaCl solution                                               | 92.2                       | 76.5                        | 737 mW/m <sup>2</sup>   | 3          |
| MDC          | Carbon graphite        | Carbon graphite                                              | 5 mg/L boron solution                                              | 61.3                       | 90.3                        | 8.93 mW /m <sup>3</sup> | 4          |
| PMDC         | Graphite plate         | Graphite plate                                               | 20 g/L salt solution                                               | 78.2                       | 65.8                        | 44.1 mW/m <sup>2</sup>  | 5          |
| MDC          | Carbon felt            | Carbon felt                                                  | 6.8 g/L of NaCl solution                                           | 14 <sup>a</sup>            | 93                          | 0.24 kWh/m <sup>3</sup> | 6          |
| APMDC        | Carbon fiber brush     | Carbon cloth coated with 0.5 gm Pt/cm <sup>2</sup>           | 35 g/L of NaCl solution                                            | 83.6                       | 30                          | 880 mW/m <sup>2</sup>   | 7          |
| MDC          | Graphite rods          | Stainless steel grid                                         | 35 g/L NaCl solution                                               | 57                         | 31                          | -                       | 8          |
| MDC          | AC-CS composite sponge | Carbon graphite                                              | 10.48 mg/L of boron-containing geothermal brine                    | 81.4                       | 65.5                        | 867 mW/m <sup>2</sup>   | 9          |
| MDC-DD       | Carbon fiber brush     | Carbon cloth coated with activated carbon-supported platinum | 20 mg/L boron solution                                             | -                          | 52%                         | -                       | 10         |
| MDC-DD       | Carbon graphite sheet  | Carbon graphite sheet                                        | 10.48 mg/L of boron-containing geothermal brine                    | ≈90                        | 90.1                        | 2759 mA/m <sup>2</sup>  | This study |
|              |                        |                                                              | 10 mg/L boron solution                                             |                            | 75.3                        | 4203 mA/m <sup>2</sup>  |            |
|              |                        |                                                              | 15.1 mg/L boron-containing RO concentrate water                    |                            | 56.9                        | 4818 mA/m <sup>2</sup>  |            |

## References

- 1 A. Ebrahimi, D. Y. Kebria and G. D. Najafpour, Co-treatment of septage and municipal wastewater in a quadripartite microbial desalination cell, *Chem. Eng. J.*, 2018, **354**, 1092–1099.
- 2 H. Luo, P. Xu, T. M. Roane, P. E. Jenkins and Z. Ren, Microbial desalination cells for improved performance in wastewater treatment, electricity production, and desalination, *Bioresour. Technol.*, 2012, **105**, 60–66.
- 3 Y. Dong, J. Liu, M. Sui, Y. Qu, J. J. Ambuchi, H. Wang and Y. Feng, A combined microbial desalination cell and electro dialysis system for copper-containing wastewater treatment and high-salinity-water desalination, *J. Hazard. Mater.*, 2017, **321**, 307–315.
- 4 A. Y. Goren and H. E. Okten, Energy production from treatment of industrial wastewater and boron removal in aqueous solutions using microbial desalination cell, *Chemosphere*, 2021, **285**, 131370.
- 5 D. Bejjanki, K. Muthukumar, T. K. Radhakrishnan, A. Alagarsamy, A. Pugazhendhi and S. N. Mohamed, Simultaneous bioelectricity generation and water desalination using *Oscillatoria* sp. as biocatalyst in photosynthetic microbial desalination cell, *Sci. Total Environ.*, 2021, **754**, 142215.
- 6 M. Ramírez-Moreno, A. Esteve-Núñez and J. M. Ortiz, Desalination of brackish water using a microbial desalination cell: Analysis of the electrochemical behaviour, *Electrochim. Acta*, 2021, **388**, 138570.
- 7 S. Rahman, A. Al-Mamun, T. Jafary, H. Alhimali and M. S. Baawain, Effect of internal and external resistances on desalination in microbial desalination cell, *Water Sci. Technol.*, 2021, **83**, 2389–2403.
- 8 R. Liaquat, T. Mehmood, A. H. Khoja, N. Iqbal, H. Ejaz and S. Mumtaz, Investigating the potential of locally sourced wastewater as a feedstock of microbial desalination cell (MDC) for bioenergy production, *Bioprocess Biosyst. Eng.*, 2021, **44**, 173–184.
- 9 A. Y. Goren and H. E. Okten, 3D electrode use in MDC for enhanced removal of boron from geothermal water, *Desalination*, 2022, **530**, 115668.
- 10 Q. Ping, I. M. Abu-Reesh and Z. He, Boron removal from saline water by a microbial desalination cell integrated with donnan dialysis, *Desalination*, 2015, **376**, 55–61.
